# Supplementary material for: The angiotensin‐(1‐7)/Mas receptor axis protects from endothelial cell senescence via klotho and Nrf2 activation
Source: PubMed Central journal article supplement (PMC6516147; doi:10.1111/acel.12913), 2019-02-17

# ONLINE DATA SUPPLEMENT

## THE ANGIOTENSIN-(1-7)/MAS RECEPTOR AXIS PROTECTS FROM ENDOTHELIAL CELL SENESENCE VIA KLOTHO AND NRF2 ACTIVATION

by

Alejandra Romero<sup>\*</sup>, Álvaro San Hipólito-Luengo<sup>\*</sup>, Laura A. Villalobos, Susana Vallejo, Inés Valencia, Patrycja Michalska, Natalia Pajuelo-Lozano, Isabel Sánchez-Pérez, Rafael León, José Luis Bartha, María Jesús Sanz, Jorge D. Erusalimsky, Carlos F. Sánchez-Ferrer, Tania Romacho<sup>\*\*</sup>, Concepción Peiró<sup>\*\*</sup>

<sup>\*</sup>Both authors contributed equally to this work

<sup>\*\*</sup>These authors jointly directed this work

### **Gene expression analysis of IL-6**

Total RNA was extracted with an RNeasy kit (Qiagen, Courtaboeuf, France) following the manufacturer's instructions. The gene expression levels of the pro-inflammatory cytokine IL-6, was assessed by RT-qPCR using a ABI7500 cycler. Data were expressed as the ratio to a house-keeping gene (GAPDH). Primer sequences are given on Table 1.

### **Staining for senescence-associated $\beta$ -galactosidase (SA- $\beta$ -gal)**

SA- $\beta$ -gal staining was assessed as previously described in the Methods section in the manuscript.

### **Cell proliferation assay**

For proliferation assays, pre-senescent (passage 3) and senescent (passage 12) HUVECs were seeded on 24-well plates at a density of 15,000 cells/well in M199 containing 20% fetal calf serum and allowed to attach for 3 h. Medium was then exchanged for 1% fetal calf serum-containing medium. Cells were allowed to proliferate for 48 h or 96 h with daily exchanges of fresh medium and treatments. After this period, cells were fixed with 1% glutaraldehyde, washed with phosphate-buffered saline (PBS) and stained with 1% crystal violet (Sigma-Aldrich). After washing with deionized water and drying, crystal violet was extracted with 10% acetic acid and proliferation was determined by reading absorbance at 595 nm, as previously described (Angulo et al., 2011).

## References

Angulo J, Peiró C, Romacho T, Fernández A, Cuevas B, González-Corrochano R...Cuevas P. (2011) Inhibition of vascular endothelial growth factor (VEGF)-induced endothelial proliferation, arterial relaxation, vascular permeability and angiogenesis by dobesilate. *European Journal of Pharmacology*. 667(1-3):153-9. <https://doi.org/10.1016/j.ejphar.2011.06.015>.

**Table1 : Real-Time PCR Primer Sequence**

| <b>Human gene</b> | <b>Forward</b>       | <b>Reverse</b>       |
|-------------------|----------------------|----------------------|
| <b>IL6</b>        | GCCAGAGCTGTGCAGATGAG | CAGTGGACAGGTTTCTGACC |
| <b>GAPDH</b>      | GAGAGACCCTCACTGCTG   | GATGGTACATGACAAGGTGG |

## Figure Legends

### **Figure S1: Replicative senescence reduces proliferation rate in HUVEC.**

Proliferation rate was assessed by crystal violet staining in pre-senescent HUVEC (passage 3) and senescent HUVEC (passage 12).  $n=4$  independent experiments.  $*p<0.05$  vs. pre-senescent cells at corresponding time point. Representative SA- $\beta$ -gal<sup>+</sup> staining microphotographs (40X) from basal unstimulated pre-senescent HUVEC (passage 3) and senescent HUVEC (passage 12) are shown on top.

**Figure S2: Ang-(1-7) prevents the effect of IL-1 $\beta$  and Ang II in late passage senescent cells.** SA- $\beta$ -gal<sup>+</sup> cells were quantified in senescent HUVEC (passage 12) treated for 18 h with IL-1 $\beta$  (2.5 ng/ml), either alone or in the presence of Ang-(1-7) (100 nM) with or without the Mas receptor antagonist A779 (1  $\mu$ M).  $n= 3$  independent experiments.  $*p<0.05$  vs. control untreated cells,  $\#p<0.05$  vs. IL-1 $\beta$  or Ang II.

### **Figure S3: Ang II and IL-1 $\beta$ and induce the gene expression of the SASP marker IL-6.**

HUVECs were treated for 18 h with Ang-(1-7) (100 nM) or IL-1 $\beta$  (2.5 ng/ml). IL-6 mRNA levels were measured by qRT-PCR.  $n=4$  independent experiments  $*p<0.05$  vs. corresponding control (untreated cells).

**Figure S4: Nrf2 mediates Ang-(1-7) and klotho anti-senescence effect in IL-1 $\beta$  and Ang II-stimulated HUVECs.** SA- $\beta$ -gal+ cells were quantified in HUVECs treated for 18 h with IL-1 $\beta$  (2.5 ng/ml) or Ang II (100 nM), some cells were co-incubated with Ang-(1-7) (100 nM) or recombinant klotho (r-klotho; 1 nM) alone or in the presence of the Nrf2 inhibitor trigonelline (1  $\mu$ M).  $n=3$  independent experiments; \* $p<0.05$  vs. control (untreated cells), # $p<0.05$  vs. Ang-(1-7) treated cells in the presence of IL-1 $\beta$  or Ang II, respectively.

**Figure S5: Klotho silencing prevents NRF2 induction by Ang-(1-7).** HUVECs transfected with scramble siRNA or klotho siRNA (50 nM) were treated for 18 h with Ang-(1-7) (100 nM). NRF2 protein levels were determined by Western blot.  $n=3$  independent experiments \* $p<0.05$  vs corresponding control (untreated cells), # $p<0.05$  vs. scramble untreated cells (control). A representative blot is shown on top.

Pre-senescent  
(passage 3)

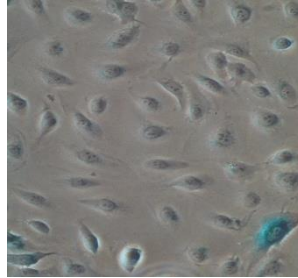

Senescent  
(passage 12)

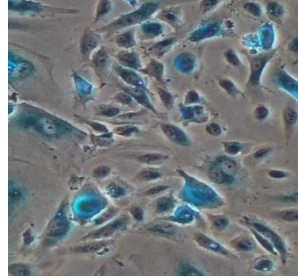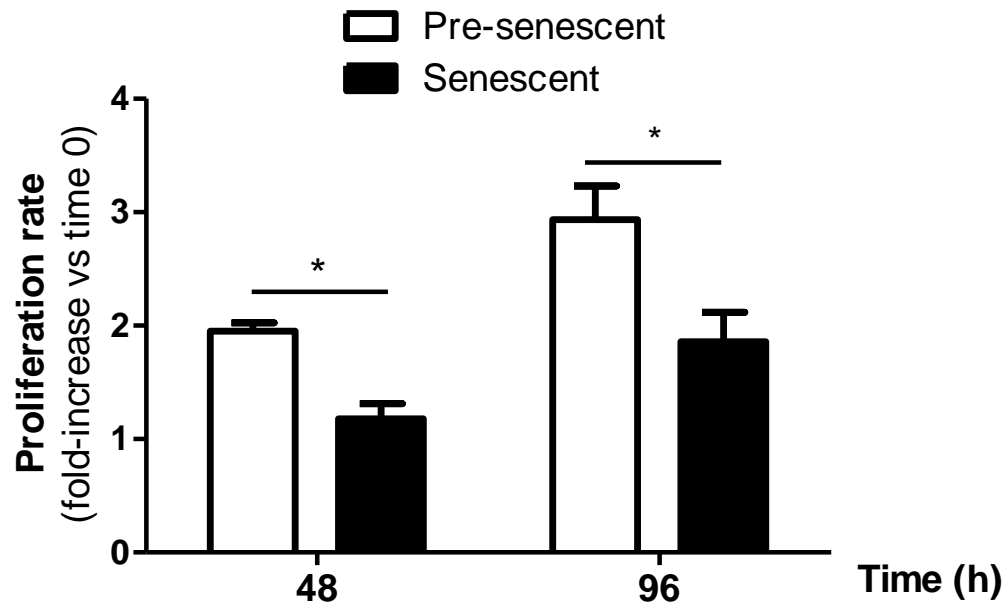

**A**

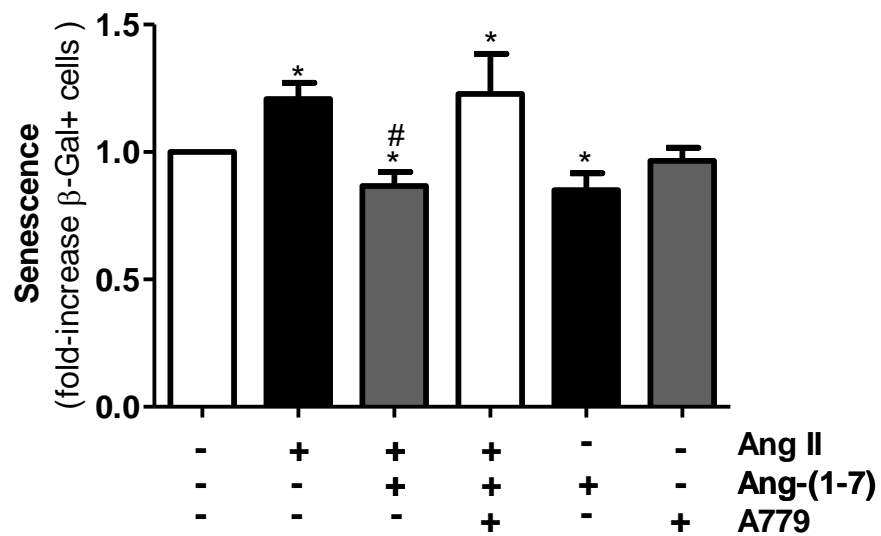

**B**

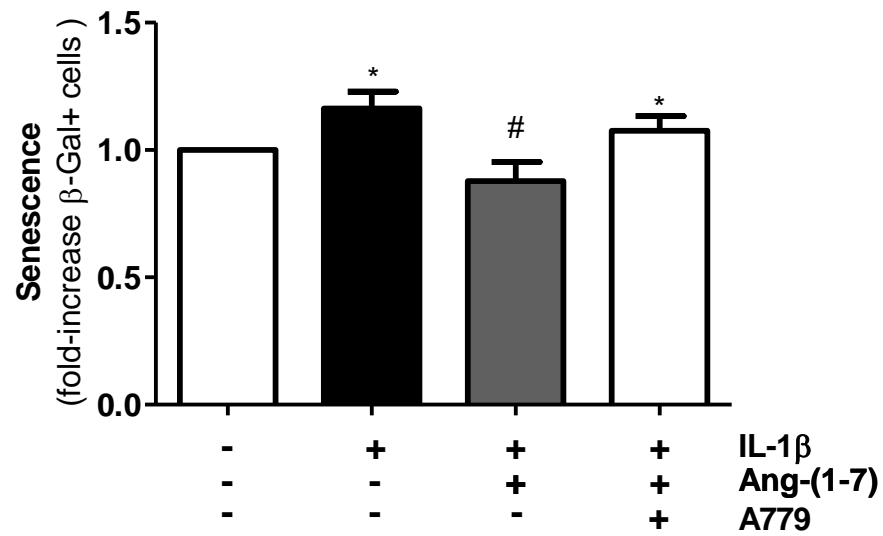



**A**

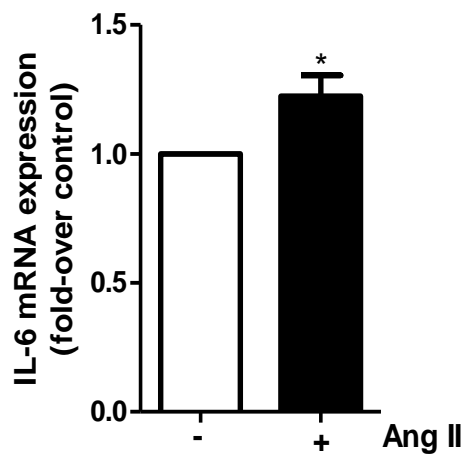

**B**

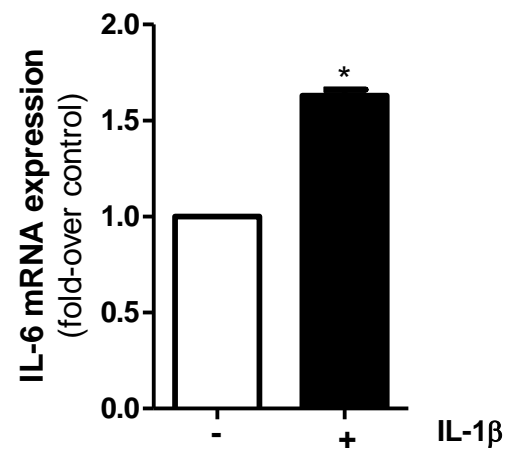

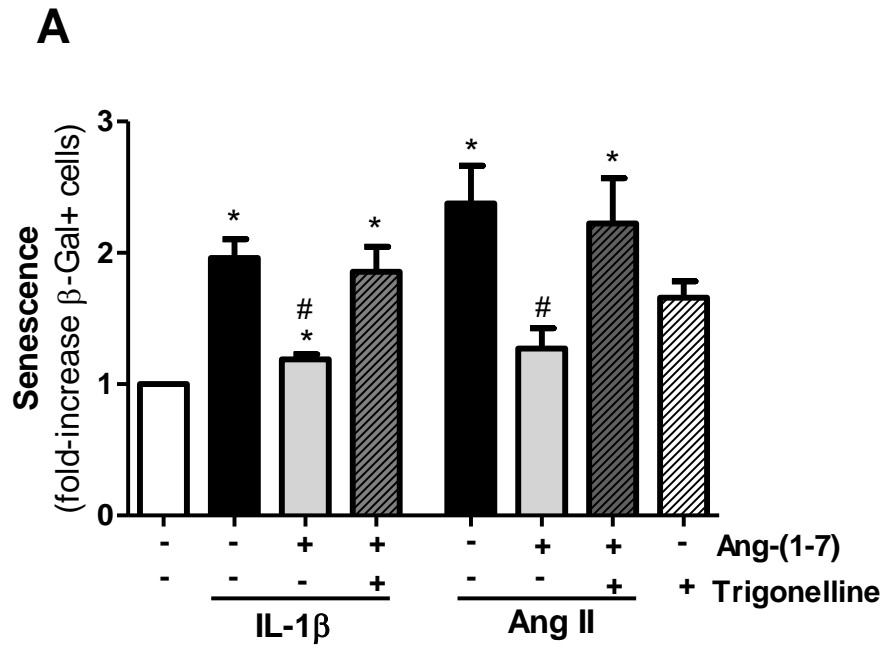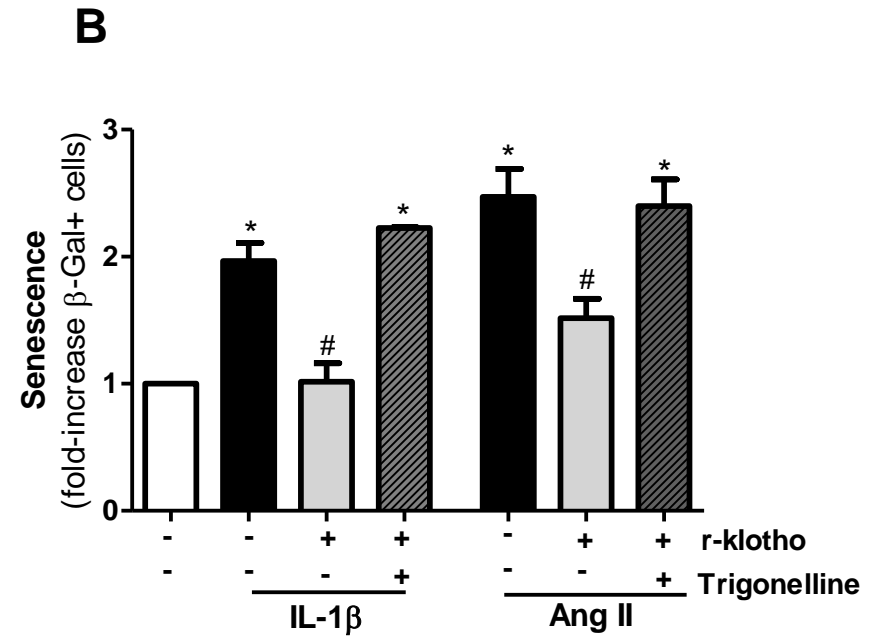

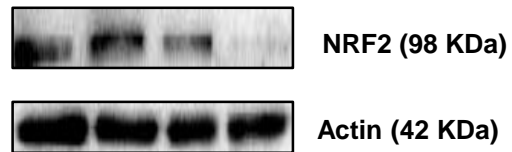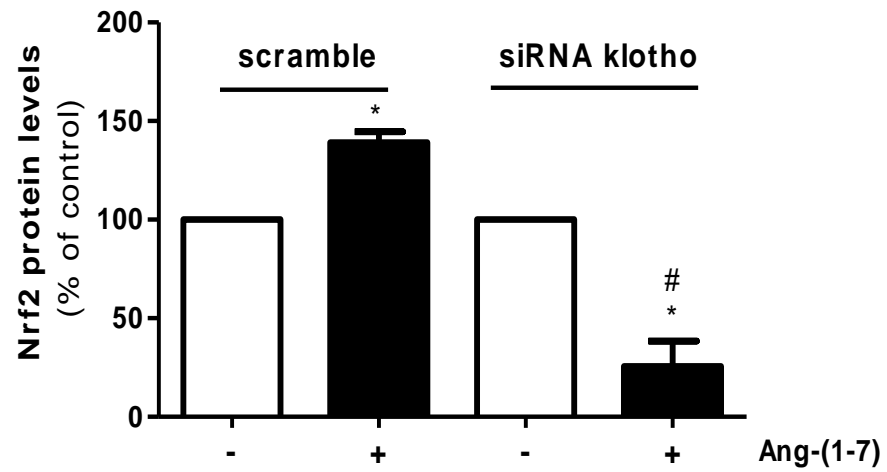

Supplement: ACEL-18-e12913-s001.pdf [file ACEL-18-e12913-s001.pdf]
